# Supplementary material for: A Biomathematical Model of Human Erythropoiesis under Erythropoietin and Chemotherapy Administration
Source: PubMed Central journal article supplement (PMC3675041; doi:10.1371/journal.pone.0065630), 2013-06-06
Supplement: pone.0065630.s001.pdf [file pone.0065630.s001.pdf]

# A biomathematical model of human erythropoiesis under erythropoietin and chemotherapy administration

S. Schirm<sup>1\*</sup>, C. Engel<sup>1</sup>, M. Loeffler<sup>1</sup>, M. Scholz<sup>1,2</sup>

**1** Institute for Medical Informatics, Statistics and Epidemiology, University of Leipzig, Leipzig, Germany

**2** LIFE Research Center of Civilization Diseases, University of Leipzig, Germany

\* E-mail: sibylle.schirm@imise.uni-leipzig.de

## A Supplement Material

### A.1 Important Model Variables and Mechanisms

Here, we briefly describe all major model variables and mechanisms of the cell kinetic model. We also provide all equations necessary to run the model. Since the presented model is closely related to a former model of granulopoiesis proposed by our group, details of regulation principles can be found in [1].

### A.2 Cell Kinetic Model

#### Amplification Splitting

Influx and efflux of cells of a compartment were amplified so that the product equals the over-all amplification ( $A_X^{\text{in}}(t) \cdot A_X^{\text{out}}(t) = A_X(t)$ ). The effect is a delayed reaction of efflux and compartment size to changes in amplification rates. It applies to all compartments with amplification, namely BE, CE, and MEB. See [1] for details.

#### Self renewal probability $p$

According to [2], this stem cell quantity is regulated by the demand of the hematopoietic bone marrow system.

$$p = F(C_S^{\text{rel}}(t), C_E^{\text{rel}}(t), C_G^{\text{rel}}(t), p_\delta, \theta_E, \theta_G, \theta_S).$$

The effect of granulopoiesis is assumed to be constant, i.e. for the present model it holds that  $C_G^{\text{rel}}(t) = 1$ . The parameters  $\theta_E, \theta_G$ , and  $\theta_S$  are hypothetical weighting factors representing the influence of the com-

**Table A.1.** variables

| quantity        | meaning                                                    | type/calculation                                     |
|-----------------|------------------------------------------------------------|------------------------------------------------------|
| $C_X$           | content of compartment X function of time t                |                                                      |
| $C_X^{nor}$     | content of compartment X in steady state (normal value)    | parameter, in general we set $C_X(0) = C_X^{nor}$    |
| $C_X^{rel}$     | content of compartments X relative to normal value         | $C_X^{rel}(t) = \frac{C_X(t)}{C_X^{nor}}$            |
| $C_X^{in}$      | influx in compartment X                                    | function of time                                     |
| $C_X^{in,nor}$  | normal influx                                              | parameter, see above                                 |
| $C_X^{out}$     | efflux from compartment X                                  | function of time                                     |
| $C_X^{out,nor}$ | normal efflux                                              | parameter, see above                                 |
| $a_X$           | proliferative fraction in cell compartment X               | function of state, sometimes constant                |
| $A_X$           | amplification in cell compartment X                        | "                                                    |
| $A_X^{in}$      | amplification of influx                                    | "                                                    |
| $A_X^{out}$     | amplification of efflux                                    | "                                                    |
| $n_X$           | average number of mitoses in cell compartment X            | $n_X = \text{ld } A_X$                               |
| $p$             | self-renewal probability of stem cells                     | function of state                                    |
| $\tau_X$        | average duration of cell cycle in compartment X            | function of time, sometimes constant (not regulated) |
| $T_X$           | average transit time of active cells in cell compartment X | $T_X = n_X \tau_X$                                   |
| $T_X^t$         | total transit time                                         | $T_X^t = \frac{n_X \tau_X}{a_X}$                     |
| $k$             | transition, degradation or toxicity coefficients           | functions of time or parameter                       |
| $Y^{min}$       | quantity Y under minimum stimulation                       | parameter to determine the regulatory function of Y  |
| $Y^{nor}$       | quantity Y in steady state                                 | "                                                    |
| $Y^{int}$       | quantity Y under intensified stimulation                   | "                                                    |
| $Y^{max}$       | quantity Y under maximum stimulation                       | "                                                    |
| $b_Y$           | sensitivity of Y under stimulation                         | "                                                    |

See also [1] for details.

partments  $E$ ,  $G$ , and  $S$  [1,2]. According to [2], it is assumed that

$$p_\delta = p^{nor} - p^{min} = p^{max} - p^{nor}$$

$$\theta_S(t) = \begin{cases} \frac{2}{C_S^{rel}(t)^{0.6}} & \text{for } C_S^{rel}(t) \leq 1 \\ 2 & \text{for } C_S^{rel}(t) > 1 \end{cases}$$

$$p = p_\delta \tanh\left(-\theta_S(t)(C_S^{rel}(t) - 1) - \theta_E(C_E^{rel}(t) - 1) - \theta_G(C_G^{rel}(t) - 1)\right) + 0.5,$$

assuming  $C_G^{\text{rel}}(t) = 1$  we have

$$p = p_\delta \tanh \left( -\theta_S(t)(C_S^{\text{rel}}(t) - 1) - \theta_E(t)(C_E^{\text{rel}}(t) - 1) \right) + 0.5 .$$

### Proliferative Fraction $a_X$

The proliferative fraction can be interpreted as the percentage of cells which are currently in cell cycle.

These quantities are regulated by the bone marrow content.

$$a_X = F(C_S^{\text{rel}}(t), C_E^{\text{rel}}(t), C_G^{\text{rel}}(t), a_X^{\text{min}}, a_X^{\text{nor}}, a_X^{\text{int}}, a_X^{\text{max}}, \omega_E, \omega_G, \omega_S),$$

The parameters  $\omega$  are again weighting factors.

$$\begin{aligned} x &= \omega_E \ln C_E^{\text{rel}}(t) + \omega_G \ln C_G^{\text{rel}}(t) \\ &+ \omega_S \begin{cases} \ln C_S^{\text{rel}}(t), & \text{for } C_S^{\text{rel}} \leq 1 \\ C_S^{\text{rel}}(t) - 1, & \text{for } C_S^{\text{rel}} > 1 \end{cases} \end{aligned} \quad (\text{A.1})$$

$$\begin{aligned} y &= -\frac{1}{2 \ln 2} \left( \ln \left( \frac{a_X^{\text{int}} - a_X^{\text{max}}}{a_X^{\text{min}} - a_X^{\text{int}}} \right) - \ln \left( \frac{a_X^{\text{nor}} - a_X^{\text{max}}}{a_X^{\text{min}} - a_X^{\text{nor}}} \right) \right) x \\ &+ \frac{1}{2} \ln \left( \frac{a_X^{\text{nor}} - a_X^{\text{max}}}{a_X^{\text{min}} - a_X^{\text{nor}}} \right) \end{aligned}$$

$$a_X = \begin{cases} \frac{a_X^{\text{max}} e^{-y} + a_X^{\text{min}} e^y}{e^{-y} + e^y} & \text{for } a_X^{\text{min}} < a_X^{\text{nor}} < a_X^{\text{int}} < a_X^{\text{max}} \\ a_X^{\text{nor}} & \text{for } a_X^{\text{min}} = a_X^{\text{nor}} = a_X^{\text{int}} = a_X^{\text{max}} \end{cases} .$$

Thus, the proliferative fraction is a monotone function ranging between  $a_X^{\text{min}}$  and  $a_X^{\text{max}}$ . Low cell numbers in the bone marrow compartments cause a higher demand of proliferating cells and therefore a larger

proliferative fraction  $a_X$ . With the assumption  $C_G^{\text{rel}}(t) = 1$ , equation A.1 reads

$$x = \omega_E \ln C_E^{\text{rel}}(t) + \omega_S \begin{cases} \ln C_S^{\text{rel}}(t), & \text{for } C_S^{\text{rel}} \leq 1 \\ C_S^{\text{rel}}(t) - 1, & \text{for } C_S^{\text{rel}} > 1 \end{cases}$$

The value  $y$  defines the actual point at the regulatory curve. The variable  $x$  represents some kind of weighted logarithmic relative system size. The proliferative fraction  $a^{\text{int}}$  corresponds to  $x = -\ln 2$  and  $a^{\text{nor}}$  corresponds to  $x = 0$ . See [1] for further details.

### Stem cell compartment S

The stem cell compartment  $S$  has self-renewal capability. Under steady state conditions, 50% of the cells which arise from  $S$  remain in this compartment, the others feed the BE compartment.

$$\frac{d}{dt}C_S = (2p - 1)C_S \frac{a_S}{\tau_S} - \Psi_S \cdot C_S \quad (\text{A.2})$$

$$C_S^{\text{out}} = 2(1 - p)C_S \frac{a_S}{\tau_S} \quad (\text{A.3})$$

where  $\Psi_S$  is the summarized chemotherapy function. It holds that  $p^{\text{nor}} = \frac{1}{2}$ . Thus, for the initial conditions it holds that

$$C_S(0) = C_S^{\text{nor}} = 1 \quad (\text{A.4})$$

$$C_S^{\text{out}}(0) = C_S^{\text{out,nor}} = 2(1 - p^{\text{nor}})C_S^{\text{nor}} \frac{a_S^{\text{nor}}}{\tau_S}. \quad (\text{A.5})$$

### Compartment BE

$$\frac{d}{dt}C_{\text{BE}} = \alpha_E C_S^{\text{out}} A_{\text{BE}}^{\text{in}} - C_{\text{BE}} \frac{a_{\text{BE}}}{\tau_{\text{BE}}} - \Psi_{\text{BE}} \cdot C_{\text{BE}}$$

$$C_{\text{BE}}^{\text{out}} = C_{\text{BE}} A_{\text{BE}}^{\text{out}} \frac{a_{\text{BE}}}{T_{\text{BE}}}$$

with the initial conditions

$$\begin{aligned}
C_{BE}(0) &= C_{BE}^{\text{nor}} = \alpha_E C_S^{\text{out,nor}} A_{BE}^{\text{in,nor}} \frac{T_{BE}^{\text{nor}}}{a_{BE}^{\text{nor}}} \\
C_{BE}^{\text{out,nor}} &= C_{BE}^{\text{nor}} A_{BE}^{\text{out,nor}} \frac{a_{BE}^{\text{nor}}}{T_{BE}^{\text{nor}}} \\
&= \alpha_E C_S^{\text{out,nor}} A_{BE}^{\text{nor}}.
\end{aligned}$$

### Compartment CE

$$\begin{aligned}
A_{CE} &= Z(C_{EPO}^{\text{rel}}) \\
\frac{d}{dt} C_{CE} &= C_{BE}^{\text{out}} A_{CE}^{\text{in}} - C_{CE} \frac{a_{CE}}{T_{CE}} - \Psi_{CE} \cdot C_{CE} \\
C_{CE}^{\text{out}} &= C_{CE} A_{CE}^{\text{out}} \frac{a_{CE}}{T_{CE}}.
\end{aligned}$$

We assume  $a_{CE} = 1$ . Thus,

$$\begin{aligned}
C_{CE}(0) &= C_{CE}^{\text{nor}} = C_{BE}^{\text{out,nor}} A_{CE}^{\text{in,nor}} T_{CE}^{\text{nor}} \\
C_{CE}^{\text{out}}(0) &= C_{CE}^{\text{out,nor}} = C_{BE}^{\text{out,nor}} A_{CE}^{\text{nor}}.
\end{aligned}$$

### Compartment PEB

$$\begin{aligned}
A_{PEB} &= Z(C_{EPO}^{\text{rel}}) \\
\frac{d}{dt} C_{PEB} &= C_{CE}^{\text{out}} A_{PEB}^{\text{in}} - C_{PEB} \frac{a_{PEB}}{T_{PEB}} - \Psi_{PEB} \cdot C_{PEB} \\
C_{PEB}^{\text{out}} &= C_{PEB} A_{PEB}^{\text{out}} \frac{a_{PEB}}{T_{PEB}}.
\end{aligned}$$

We assume  $a_{PEB} = 1$ . Thus,

$$\begin{aligned}
C_{PEB}(0) &= C_{PEB}^{\text{nor}} = C_{CE}^{\text{out,nor}} A_{PEB}^{\text{in,nor}} \frac{T_{PEB}^{\text{nor}}}{a_{PEB}^{\text{nor}}} \\
C_{PEB}^{\text{out}}(0) &= C_{PEB}^{\text{out,nor}} = C_{CE}^{\text{out,nor}} A_{PEB}^{\text{nor}}.
\end{aligned}$$

## Compartment MEB

The maturation is modeled by splitting MEB into  $N_{\text{MEB}} = 15$  subcompartments without amplification.

$$\begin{aligned}
T_{\text{MEB}} &= Z(C_{\text{EPO}}^{\text{rel}}) \\
C_{\text{MEB}} &= \sum_{i=1}^{N_{\text{MEB}}} C_{\text{MEB}_i} \\
\frac{d}{dt} C_{\text{MEB}_1} &= C_{\text{PEB}}^{\text{out}} - C_{\text{MEB}_1} \frac{N_{\text{MEB}}}{T_{\text{MEB}}} - \Psi_{\text{MEB}} \cdot C_{\text{MEB}_1} \\
\frac{d}{dt} C_{\text{MEB}_i} &= C_{\text{MEB}_{i-1}}^{\text{out}} - C_{\text{MEB}_i} \frac{N_{\text{MEB}}}{T_{\text{MEB}}} - \Psi_{\text{MEB}} \cdot C_{\text{MEB}_i}, \quad i = 2, \dots, N_{\text{MEB}} \\
C_{\text{MEB}_i}^{\text{out}} &= C_{\text{MEB}_i} \frac{N_{\text{MEB}}}{T_{\text{MEB}}}, \quad i = 1, \dots, N_{\text{MEB}} \\
C_{\text{MEB}}^{\text{out}} &= C_{\text{MEB}_{N_{\text{MEB}}}}^{\text{out}},
\end{aligned}$$

with the initial values

$$\begin{aligned}
C_{\text{MEB}}(0) &= C_{\text{MEB}}^{\text{nor}} = C_{\text{PEB}}^{\text{out,nor}} T_{\text{MEB}}^{\text{nor}} \\
C_{\text{MEB}_i}(0) &= C_{\text{MEB}_i}^{\text{nor}} = C_{\text{PEB}}^{\text{out,nor}} \frac{T_{\text{MEB}}^{\text{nor}}}{N_{\text{MEB}}}, \quad i = 1, \dots, N_{\text{MEB}} \\
C_{\text{MEB}_i}^{\text{out}}(0) &= C_{\text{MEB}_i}^{\text{out,nor}} = C_{\text{MEB}_i}^{\text{nor}} \frac{N_{\text{MEB}}}{T_{\text{MEB}}^{\text{nor}}} = C_{\text{PEB}}^{\text{out,nor}}, \quad i = 1, \dots, N_{\text{MEB}} \\
C_{\text{MEB}}^{\text{out}}(0) &= C_{\text{MEB}}^{\text{out,nor}} = C_{\text{MEB}_{N_{\text{MEB}}}}^{\text{out,nor}} = C_{\text{PEB}}^{\text{out,nor}}.
\end{aligned}$$

## Compartment RET

$$\begin{aligned}
T_{\text{RET}} &= T_{\text{MEB}}^{\text{nor}} + T_{\text{RET}}^{\text{nor}} - T_{\text{MEB}} \\
\frac{d}{dt} C_{\text{RET}} &= C_{\text{MEB}}^{\text{out}} - \frac{C_{\text{RET}}}{T_{\text{RET}}} \\
C_{\text{RET}}^{\text{out}} &= \frac{C_{\text{RET}}}{T_{\text{RET}}} \\
C_{\text{RET}}(0) &= C_{\text{RET}}^{\text{nor}} = C_{\text{ERY}}^{\text{nor}} \frac{q_{\text{RET}}}{1 - q_{\text{RET}}} \\
C_{\text{RET}}^{\text{out}}(0) &= C_{\text{RET}}^{\text{out,nor}} = C_{\text{MEB}}^{\text{out,nor}} \\
T_{\text{RET}}^{\text{nor}} &= \frac{C_{\text{RET}}^{\text{nor}}}{C_{\text{RET}}^{\text{out,nor}}} = \frac{q_{\text{RET}}}{1 - q_{\text{RET}}} \left( (1 - s_{\text{ERY}}^{\text{nor}}) T_{\text{ERY\_rnd}} + s_{\text{ERY}}^{\text{nor}} T_{\text{ERY\_age}} \right).
\end{aligned}$$

$q_{\text{RET}}$  is the ratio of reticulocytes to the total number of red blood cells in steady state.  $s_{\text{ERY}}^{\text{nor}}$ ,  $T_{\text{ERY\_rnd}}$ , and  $T_{\text{ERY\_age}}$  are explained in the next section.

## Compartment ERY

The compartment ERY is split into the subcompartments "RANDOM" and "AGE". In steady state, most erythrocytes die dependent on age. The age dependent reduction is modeled by division into subcompartments. Under stimulation, the apoptosis is more randomly (see [3]). To model this observation, the influxes into the subcompartments "RANDOM" and "AGE" are regulated by the factor  $s_{\text{ERY}}$ , which depends on the bone marrow output of the reticulocytes.  $T_{\text{ERY\_rnd}}$ , and  $T_{\text{ERY\_age}}$  are the corresponding transition times of these compartments (see [1–4] for details.)

$$\begin{aligned}
s_{\text{ERY}} &= \exp\left(\left(\frac{C_{\text{RET}}^{\text{out}}}{C_{\text{RET}}^{\text{out,nor}}}\right)^2 \ln s_{\text{ERY}}^{\text{nor}}\right) \\
C_{\text{ERY}} &= C_{\text{ERY\_age}} + C_{\text{ERY\_rnd}} \\
C_{\text{ERY\_age}} &= \sum_{i=1}^{N_{\text{ERY}}} C_{\text{ERY\_age},i} \\
\frac{d}{dt}C_{\text{ERY\_age},1} &= s_{\text{ERY}}C_{\text{RET}}^{\text{out}} - C_{\text{ERY\_age},1}\frac{N_{\text{ERY}}}{T_{\text{ERY\_age}}} \\
\frac{d}{dt}C_{\text{ERY\_age},i} &= C_{\text{ERY\_age},(i-1)}^{\text{out}} - C_{\text{ERY\_age},i}^{\text{out}}, \quad i = 2, \dots, N_{\text{ERY}} \\
C_{\text{ERY\_age},i}^{\text{out}} &= C_{\text{ERY\_age},i}\frac{N_{\text{ERY}}}{T_{\text{ERY\_age}}} \\
\frac{d}{dt}C_{\text{ERY\_rnd}} &= (1 - s_{\text{ERY}})C_{\text{RET}}^{\text{out}} - C_{\text{ERY\_rnd}}\frac{1}{T_{\text{ERY\_rnd}}},
\end{aligned}$$

with initial conditions

$$\begin{aligned}
C_{\text{ERY}}(0) &= C_{\text{ERY}}^{\text{nor}} = C_{\text{ERY\_age}}^{\text{nor}} + C_{\text{ERY\_rnd}}^{\text{nor}} \\
C_{\text{ERY\_age}}(0) &= C_{\text{ERY\_age}}^{\text{nor}} = \sum_{i=1}^{N_{\text{ERY}}} C_{\text{ERY\_age},i}^{\text{nor}} = s_{\text{ERY}}^{\text{nor}}C_{\text{RET}}^{\text{out,nor}}T_{\text{ERY\_age}} \\
C_{\text{ERY\_age},1}(0) &= C_{\text{ERY\_age},1}^{\text{nor}} = s_{\text{ERY}}^{\text{nor}}C_{\text{RET}}^{\text{out,nor}}\frac{T_{\text{ERY\_age}}}{N_{\text{ERY}}}
\end{aligned}$$

$$\begin{aligned}
C_{\text{ERY\_age-}i}(0) &= C_{\text{ERY\_age-}i}^{\text{nor}} = C_{\text{ERY\_age-}i-1}^{\text{out\_nor}} \frac{T_{\text{ERY\_age}}}{N_{\text{ERY}}}, \quad i = 2, \dots, N_{\text{ERY}} \\
&= s_{\text{ERY}}^{\text{nor}} C_{\text{RET}}^{\text{out\_nor}} \frac{T_{\text{ERY\_age}}}{N_{\text{ERY}}}, \quad i = 1, \dots, N_{\text{ERY}} \\
C_{\text{ERY\_age-}i}^{\text{out}}(0) &= C_{\text{ERY\_age-}i}^{\text{out\_nor}} = C_{\text{ERY\_age-}i}^{\text{nor}} \frac{N_{\text{ERY}}}{T_{\text{ERY\_age}}} = s_{\text{ERY}}^{\text{nor}} C_{\text{RET}}^{\text{out\_nor}} \\
C_{\text{ERY\_rnd}}(0) &= C_{\text{ERY\_rnd}}^{\text{nor}} = (1 - s_{\text{ERY}}^{\text{nor}}) C_{\text{RET}}^{\text{out\_nor}} T_{\text{ERY\_rnd}}
\end{aligned}$$

## Endogenous production of EPO

The endogenous production of EPO ( $EPO_{\text{prod}}$ ) is assumed to be dependent on the tissue oxygen tension in the kidneys and the number of circulating red blood cells (see [4, 5]). Pantel [4] and Wichmann [5] proposed the following model of this process.

**Table A.2.** Variables for endogenous EPO production

| quantity                       | meaning                                                     | type/calculation |        |
|--------------------------------|-------------------------------------------------------------|------------------|--------|
| $P_{O_2}^t$                    | tissue oxygen tension in kidneys                            | function of time | [4, 5] |
| $P_{O_2}^{t,\text{nor}}$       | normal value of tissue oxygen tension in kidneys            |                  | [4, 5] |
| $S_{O_2}^t$                    | tissue saturation of oxygen                                 | function of time | [4, 5] |
| $S_{O_2}^{t,\text{nor}}$       | normal tissue saturation of oxygen                          | constant         | [4, 5] |
| $P_{50}$                       | partial oxygen pressure corresponding to $S_{O_2}^t = 50\%$ | 26.5 mm Hg       | [4, 5] |
| $P_{O_2}^{A,\text{nor}}$       | arterial oxygen tension, normal value                       | 97 mm Hg         | [4, 5] |
| $\Delta SO_2$                  | desaturation of HB (arteriovenous difference), normal value | 20 %             | [4, 5] |
| $\gamma$                       | Hill coefficient                                            | 2.65             | [4, 5] |
| $P_{\text{max}}^{\text{endo}}$ | maximum EPO production                                      | 200 (set)        | [4, 5] |
| $b_{\text{EPO}}$               | sensitivity of EPO production to changes in $P_{O_2}^t$     | $\ln 200$ (set)  | [4, 5] |

$$P_{O_2}^t = P_{50} \cdot \left( \frac{S_{O_2}^t}{100 - S_{O_2}^t} \right)^{\frac{1}{\gamma}} \quad (\text{Hill equation}) \quad (\text{A.6})$$

$$S_{O_2}^t = \frac{100}{\left( \frac{P_{50}}{P_{O_2}^{A,\text{nor}}} \right)^{\gamma} + 1} - \Delta SO_2 \cdot \frac{RET^{\text{nor}} + ERY^{\text{nor}}}{C_{\text{RET}} + C_{\text{ERY}}} \quad (\text{A.7})$$

$$S_{O_2}^{t,\text{nor}} = \frac{100}{\left( \frac{P_{50}}{P_{O_2}^{A,\text{nor}}} \right)^{\gamma} + 1} - \Delta SO_2 \quad (\text{A.8})$$

$$P_{O_2}^{t,\text{nor}} = P_{50} \cdot \left( \frac{S_{O_2}^{t,\text{nor}}}{100 - S_{O_2}^{t,\text{nor}}} \right)^{\frac{1}{\gamma}} \quad (\text{A.9})$$



Define  $f = \frac{P_{O_2}^t}{P_{O_2}^{t,nor}}$ , we assume

$$\begin{aligned} \text{EPO}_{\text{prod}} &= P_{\text{max}}^{\text{endo}} \cdot e^{-b_{\text{EPO}} \cdot f} \quad [4] \\ \text{EPO}_{\text{prod}}(0) &= 1. \end{aligned} \quad (\text{A.10})$$

For further explanations and justifications, see [4, 5].

### A.3 List of Model Parameters

| parameter                      | value  |                      |        |            |
|--------------------------------|--------|----------------------|--------|------------|
| $q_{\text{RET}}$               | 0.016  |                      | set    |            |
| $T_{\text{ERY}}^{\text{rnd}}$  | 1020.4 | h                    | set    | [6]        |
| $T_{\text{ERY}}^{\text{age}}$  | 3061.2 | h                    | set    | [6]        |
| $s_{\text{ERY}}^{\text{nor}}$  | 0.900  |                      | set    | [4], p. 40 |
| $N_{\text{ERY}}$               | 10.0   |                      | set    | [4], p. 41 |
| $\text{HCT}^{\text{nor}}$      | 0.430  |                      | set    |            |
| $\text{ERY}^{\text{nor}}$      | 4.50   |                      | set    |            |
| $\text{RET}^{\text{nor}}$      | 100    | x1000/ $\mu\text{l}$ | set    |            |
| $\text{RET}\%^{\text{nor}}$    | 9.50   |                      | set    |            |
| $\text{HB}^{\text{nor}}$       | 13.5   |                      | set    |            |
| $P_{\text{max}}^{\text{endo}}$ | 200    |                      | set    | [4]        |
| $b_{\text{EPO}}$               | 5.30   |                      | fitted |            |
| $\text{EPO}_{\text{Vc}}$       | 0.0320 | l/kg                 | set    | [7]        |
| $\text{EPO}_{\text{serum}}$    | 15     | IU/l                 | set    | [7]        |
| $a_{\text{BE}}^{\text{min}}$   | 0.30   |                      | set    | [2], p. 71 |
| $a_{\text{BE}}^{\text{nor}}$   | 0.33   |                      | set    | [2], p. 71 |
| $a_{\text{BE}}^{\text{int}}$   | 0.66   |                      | set    | [2], p. 71 |
| $a_{\text{BE}}^{\text{max}}$   | 1.00   |                      | set    | [2], p. 71 |
| $\alpha_G$                     | 0.8    |                      | set    | [2], p. 73 |
| $\alpha_E$                     | 0.15   |                      | set    | [2], p. 73 |
| $S^{\text{nor}}$               | 1      |                      | set    |            |
| $\tau_S$                       | 8      |                      | set    | [2], p. 70 |
| $a_S^{\text{min}}$             | 0.01   |                      | set    | [2], p. 70 |
| $p_\delta$                     | 0.1    |                      | set    | [2], p. 70 |
| $a_S^{\text{nor}}$             | 0.15   |                      | set    | [2], p. 70 |
| $a_S^{\text{int}}$             | 0.45   |                      | set    | [2], p. 70 |
| $a_S^{\text{max}}$             | 1      |                      | set    | [2], p. 70 |
| $w_E$                          | 0.3    |                      | set    | [2], p. 70 |
| $w_G$                          | 0.1    |                      | set    | [2], p. 70 |
| $w_S$                          | 1      |                      | set    | [2], p. 70 |
| $\vartheta_E$                  | -2     |                      | set    | [2], p. 70 |
| $\vartheta_G$                  | -8     |                      | set    | [2], p. 70 |

**Table A.3.** EPO PK/PD parameters

| Alfa, Beta, Delta, endogenous EPO |          |        | Darbepoetin Alfa |          |        |
|-----------------------------------|----------|--------|------------------|----------|--------|
| $k_{el}$                          | 0.102    | fitted |                  | 0.062    | fitted |
| $k_{12}$                          | 0.079    | fitted |                  | 0.294    | fitted |
| $k_{21}$                          | 0.084    | fitted |                  | 0.291    | fitted |
| $k_{on}$                          | 0.070    | set    | [7]              | 0.043    | fitted |
| $k_{off}$                         | 14.27    | set    | [7]              | 9.62     | fitted |
| $R_0$                             | 64.31    | set    | [7]              | 64.31    | set    |
| $k_{int}$                         | 2        | set    | [7]              | 1.14     | fitted |
| $k_{deg}$                         | 0.101    | set    | [7]              | 0.116    | fitted |
| $w_{RET}$                         | 0.05     | set    |                  | 0.05     | set    |
| $w_{MEB}$                         | 0.087    | fitted |                  | 0.125    | fitted |
| $w_{PEB}$                         | 0.293    | fitted |                  | 0.509    | fitted |
| $w_{CE}$                          | 3.84     | fitted |                  | 2.69     | fitted |
| $w_{BE}$                          | 0.0881   | fitted |                  | 0.111    | fitted |
| $k_{on}/k_{off}$                  | 0.004875 |        |                  | 0.004453 |        |
| $T_{BE}^{min}$                    | 155.7    | h      | fitted           | 124.6    | fitted |
| $T_{BE}^{nor}$                    | 40       | h      | set              | 40       | set    |
| $T_{BE}^{max}$                    | 28.60    | h      | fitted           | 34.22    | fitted |
| $T_{BE}^b$                        | 1.134    |        | fitted           | 3.559    | fitted |
| $A_{BE}^{min}$                    | 25.04    |        | fitted           | 47.10    | fitted |
| $A_{BE}^{nor}$                    | 64       |        | set              | 64       | set    |
| $A_{BE}^{max}$                    | 194.7    |        | fitted           | 115.5    | fitted |
| $A_{BE}^b$                        | 2.321    |        | fitted           | 0.1659   | fitted |
| $A_{CE}^{min}$                    | 0.9645   |        | fitted           | 0.5717   | fitted |
| $A_{CE}^{nor}$                    | 32       |        | set              | 32       | set    |
| $A_{CE}^{max}$                    | 104.7    |        | fitted           | 127.8    | fitted |
| $A_{CE}^b$                        | 0.0438   |        | fitted           | 0.3956   | fitted |
| $T_{CE}^{min}$                    | 186.7    | h      | fitted           | 387.3    | fitted |
| $T_{CE}^{nor}$                    | 40       | h      | set              | 40       | set    |
| $T_{CE}^{max}$                    | 15.25    | h      | fitted           | 36.23    | fitted |
| $T_{CE}^b$                        | 0.3920   |        | fitted           | 0.1305   | fitted |
| $T_{PEB}^{min}$                   | 99.25    | h      | fitted           | 178.4    | fitted |
| $T_{PEB}^{nor}$                   | 48       | h      | set              | 48       | set    |
| $T_{PEB}^{max}$                   | 8.809    | h      | fitted           | 15.74    | fitted |
| $T_{PEB}^b$                       | 1.301    |        | fitted           | 1.847    | fitted |
| $A_{PEB}^{min}$                   | 0.6862   |        | fitted           | 0.8078   | fitted |
| $A_{PEB}^{nor}$                   | 64       |        | set              | 64       | set    |
| $A_{PEB}^{max}$                   | 75.38    |        | fitted           | 139.6    | fitted |
| $A_{PEB}^b$                       | 0.4135   |        | fitted           | 0.1331   | fitted |
| $T_{MEB}^{min}$                   | 144.8    | h      | fitted           | 186.7    | fitted |
| $T_{MEB}^{nor}$                   | 100.2    | h      | fitted           | 100.2    | fitted |
| $T_{MEB}^{max}$                   | 90.17    | h      | fitted           | 26.98    | fitted |
| $T_{MEB}^b$                       | 0.5395   |        | fitted           | 0.1965   | fitted |

**Table A.4.** EPO absorption parameters after subcutaneous injection (fitted)

|               | Alfa,<br>abdomen,<br>upper<br>arm | Alfa,<br>fore-<br>arm | Alfa,<br>shoulder | Alfa,<br>thigh | Beta,<br>abdomen | Beta,<br>thigh | Beta,<br>fore-<br>arm | Delta  | Darb-<br>epoetin<br>Alfa |
|---------------|-----------------------------------|-----------------------|-------------------|----------------|------------------|----------------|-----------------------|--------|--------------------------|
| $k_a^F$       | 0.5320                            | 0.7786                | 0.7119            | 0.7374         | 0.3747           | 0.4528         | 0.4077                | 0.6657 | 3.0148                   |
| $k_e^F$       | 0.2713                            | 0.1337                | 0.1263            | 0.3295         | 0.1062           | 0.0656         | 0.1873                | 0.1517 | 0.1938                   |
| $k_{Delay}^L$ | 0.0390                            | 0.0510                | 0.1460            | 0.0298         | 0.0699           | 0.0410         | 0.0476                | 0.2367 | 0.0241                   |
| $k_a^L$       | 0.1172                            | 0.0901                | 0.1326            | 0.1588         | 0.2309           | 0.2024         | 0.4687                | 0.1065 | 1.1192                   |
| $k_e^L$       | 0.4334                            | 0.4904                | 0.4066            | 0.4343         | 0.0950           | 0.0557         | 0.1587                | 0.3321 | 0.1769                   |
| $k_{Delay}^F$ | 0.3275                            | 0.3259                | 0.6029            | 0.1626         | 0.3705           | 0.2078         | 0.2819                | 0.7508 | 0.1161                   |
| $k_{FL}$      | 1.0074                            | 3.6252                | 3.9596            | 0.7213         | 1.2138           | 1.0453         | 1.1987                | 3.4461 | 5.5404                   |

**Table A.5.** Toxicity parameters of Chemotherapies

| drug or drug<br>combination                                                        | Therapy                          | FC    | Delay | S     | BE    | CE    | PEB   | MEB   | RET   |
|------------------------------------------------------------------------------------|----------------------------------|-------|-------|-------|-------|-------|-------|-------|-------|
| Cyclophosphamid<br>650 mg/m <sup>2</sup><br>Doxorubicin<br>25 mg/m <sup>2</sup>    | BEACOPP                          | 1.111 | 0.064 | 0.001 | 0.000 | 0.000 | 0.005 | 0.000 | 0.002 |
| Cyclophosphamid<br>750 mg/m <sup>2</sup><br>Doxorubicin<br>50 mg/m <sup>2</sup>    | CHOP                             | 1.111 | 0.064 | 0.216 | 0.000 | 0.017 | 0.006 | 0.117 | 0.036 |
| Cyclophosphamid<br>1250 mg/m <sup>2</sup><br>Doxorubicin<br>35 mg/m <sup>2</sup>   | BEACOPP<br>escalated             | 1.111 | 0.064 | 0.212 | 0.001 | 0.001 | 0.016 | 0.030 | 0.021 |
| Cyclophosphamid<br>1400 mg/m <sup>2</sup><br>Doxorubicin<br>32.5 mg/m <sup>2</sup> | high<br>CHOEP                    | 1.111 | 0.064 | 0.194 | 0.002 | 0.021 | 0.063 | 0.117 | 0.067 |
| Etoposid<br>100 mg/m <sup>2</sup>                                                  | CHOEP                            | 1.097 | 0.068 | 0.000 | 0.000 | 0.000 | 0.041 | 0.000 | 0.011 |
| Etoposid<br>200 mg/m <sup>2</sup>                                                  | BEACOPP<br>escalated             | 1.097 | 0.068 | 0.000 | 0.000 | 0.000 | 0.057 | 0.013 | 0.020 |
| Etoposid<br>175 mg/m <sup>2</sup>                                                  | high<br>CHOEP                    | 1.097 | 0.068 | 0.024 | 0.001 | 0.000 | 0.044 | 0.000 | 0.026 |
| Procarbazine<br>100 mg/m <sup>2</sup>                                              | BEACOPP<br>escalated,<br>BEACOPP | 1.092 | 0.013 | 0.002 | 0.011 | 0.004 | 0.013 | 0.000 | 0.000 |
| Bleomycin<br>10 mg/m <sup>2</sup>                                                  | BEACOPP<br>escalated,<br>BEACOPP | 1.323 | 0.003 | 0.012 | 0.010 | 0.011 | 0.001 | 0.030 | 0.000 |
| Platinum<br>Etoposide                                                              | Platinum +<br>Etoposide          | 1.000 | 1.219 | 0.338 | 0.011 | 0.002 | 0.008 | 0.007 | 0.000 |
| Paclitaxel<br>225 mg/m <sup>2</sup>                                                | ETC                              | 1.050 | 0.017 | 0.246 | 0.000 | 0.436 | 1.748 | 0.000 | 0.096 |
| Cyclophosphamid<br>2500 mg/m <sup>2</sup>                                          | ETC                              | 1.005 | 0.064 | 0.199 | 0.033 | 0.056 | 0.059 | 0.000 | 0.267 |
| Epirubicin<br>150 mg/m <sup>2</sup>                                                | ETC                              | 1.988 | 0.045 | 0.003 | 0.005 | 1.506 | 2.909 | 0.022 | 3.273 |
| Cyclophosphamid<br>600 mg/m <sup>2</sup>                                           | ECT                              | 1.005 | 0.064 | 0.199 | 0.003 | 0.008 | 0.016 | 0.000 | 0.045 |
| Epirubicin<br>90 mg/m <sup>2</sup>                                                 | ECT                              | 1.988 | 0.045 | 0.000 | 0.000 | 0.041 | 0.179 | 0.001 | 0.174 |
| Paclitaxel<br>175 mg/m <sup>2</sup>                                                | ECT                              | 1.050 | 0.017 | 0.000 | 0.000 | 0.167 | 0.113 | 0.000 | 0.040 |

**Table A.6.** Derived quantities based on parameters of the injection model

|             |                    | bioavailability |
|-------------|--------------------|-----------------|
| Alfa        | abdomen, upper arm | 0.4123          |
| Alfa        | shoulder           | 0.3513          |
| Alfa        | forearm            | 0.2957          |
| Alfa        | thigh              | 0.5204          |
| Beta        | abdomen            | 0.7286          |
| Beta        | thigh              | 0.8137          |
| Beta        | forearm            | 0.7266          |
| Delta       |                    | 0.3524          |
| Darbepoetin |                    | 0.8914          |

#### A.4 Sensitivity Analysis of Model Parameters

We analyzed the sensitivity of the model parameters in the following way. The parameters were increased or decreased by 2.5 % and the change of the sum of the fitness functions as percentage is plotted as bar diagrams. Values of the fitness functions of different scenarios are added.

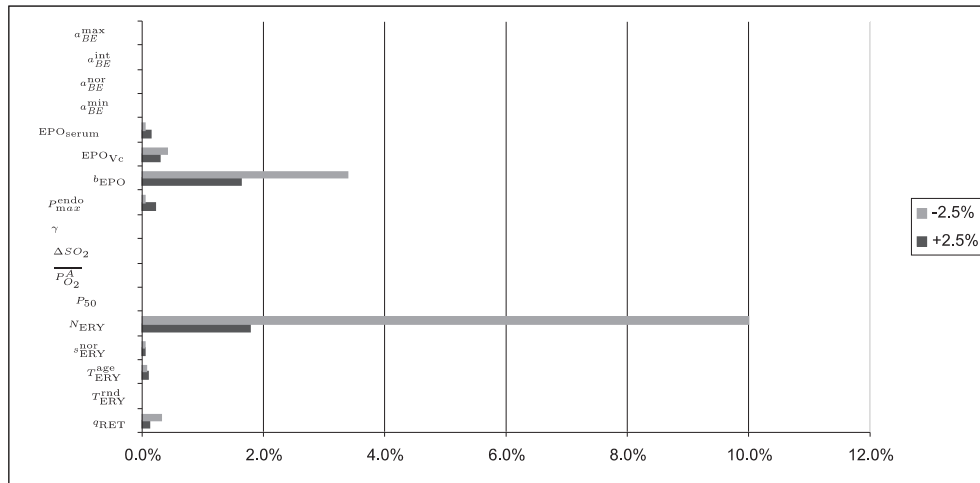

**Figure 1.** Sensitivity of parameters used for EPO Alfa, Beta, Delta, and Darbepoetin Alfa

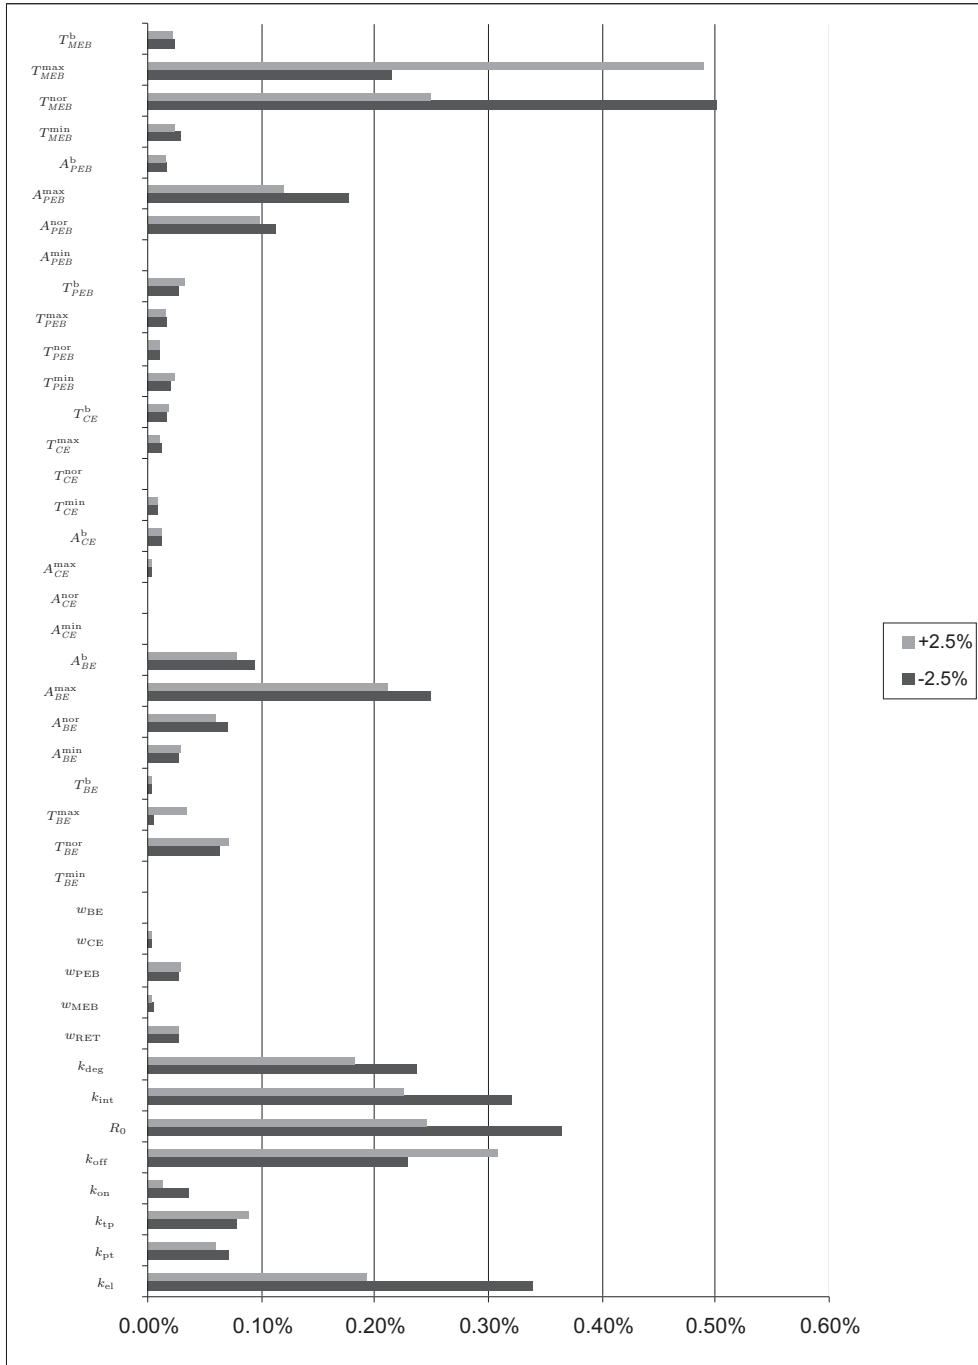

Figure 2. Sensitivity of the PK/PD parameters of EPO Alfa, Beta, Delta

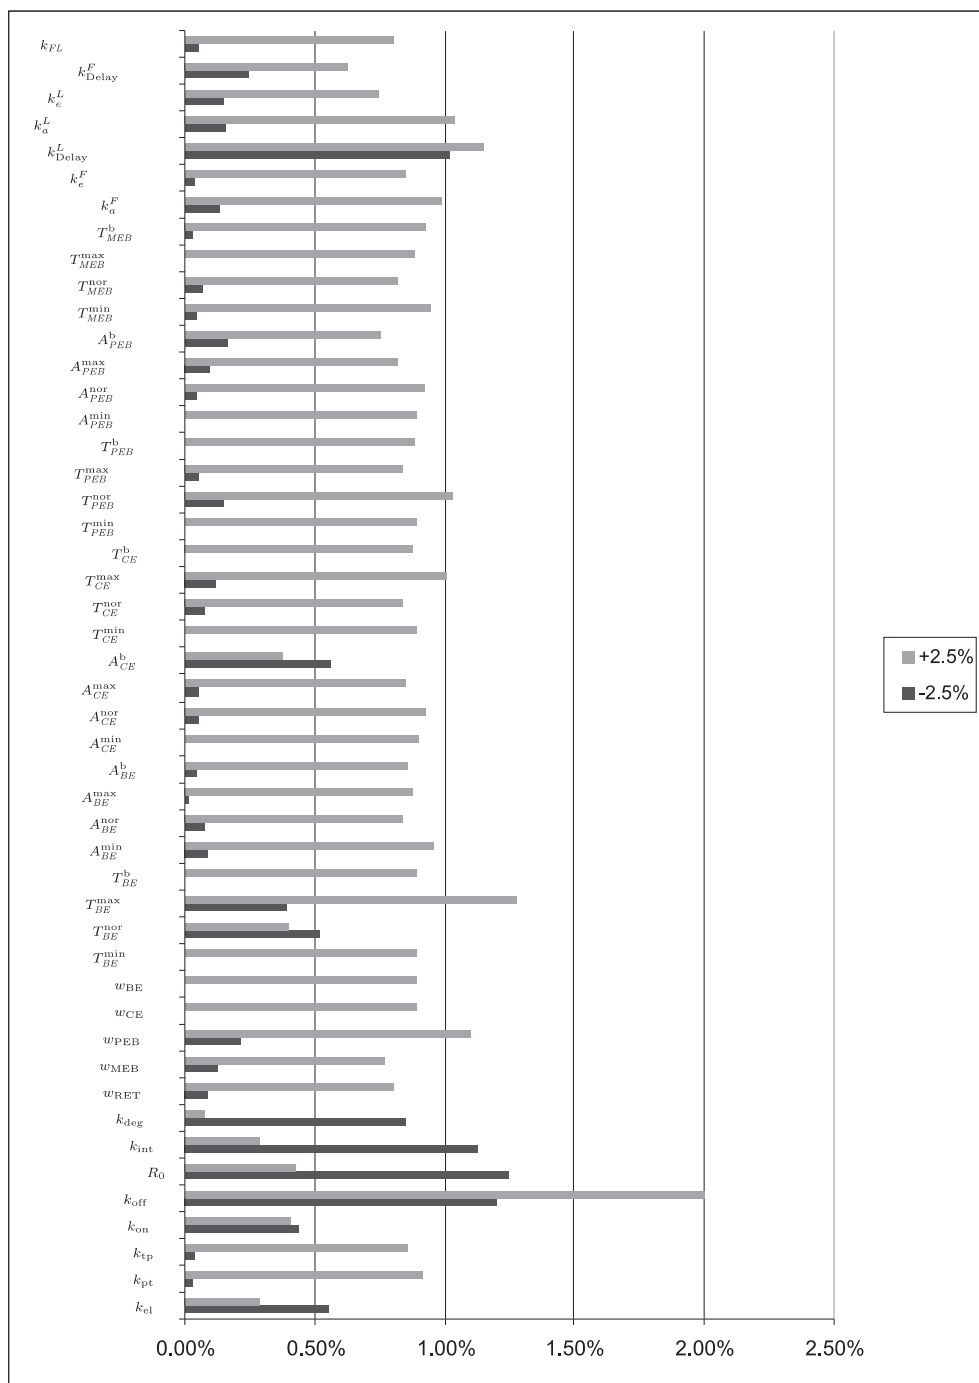

Figure 3. Sensitivity of the PK/PD parameters for Darbepoetin.

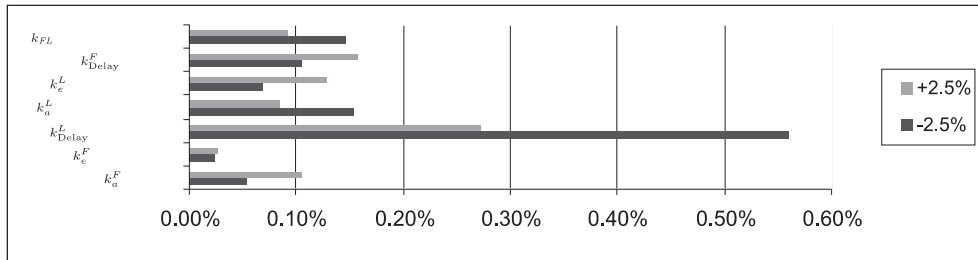

Figure 4. Sensitivity of the different parameters for subcutaneous injection of EPO Alfa, Beta, Delta

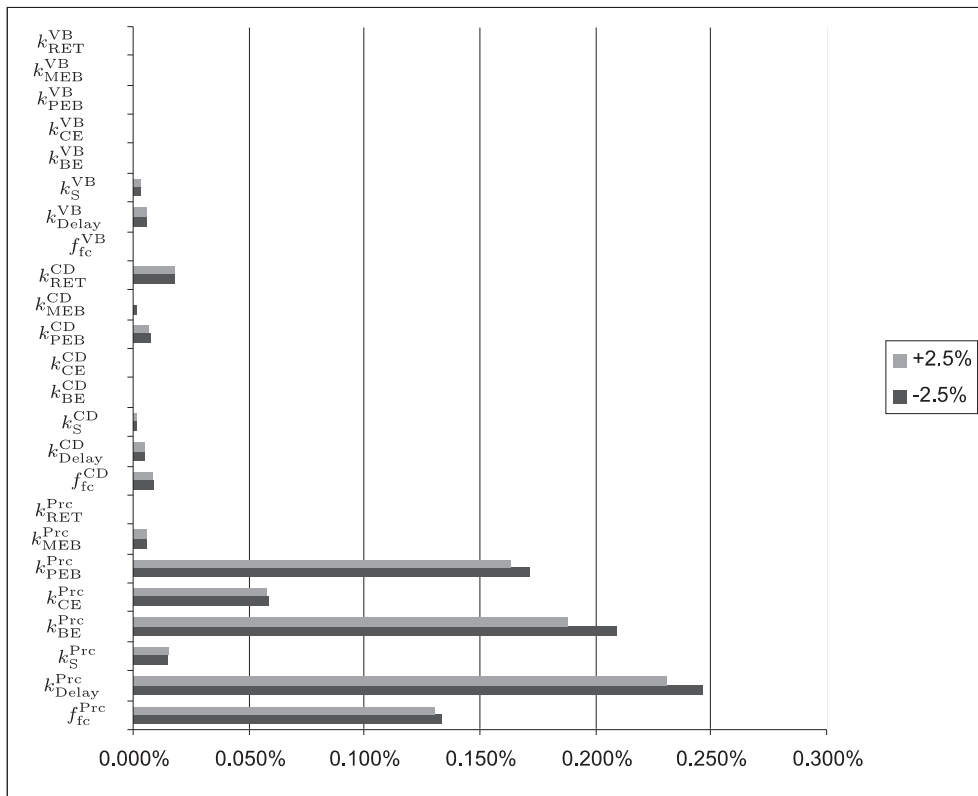

Figure 5. Sensitivity of toxicity parameters for BEACOPP chemotherapy

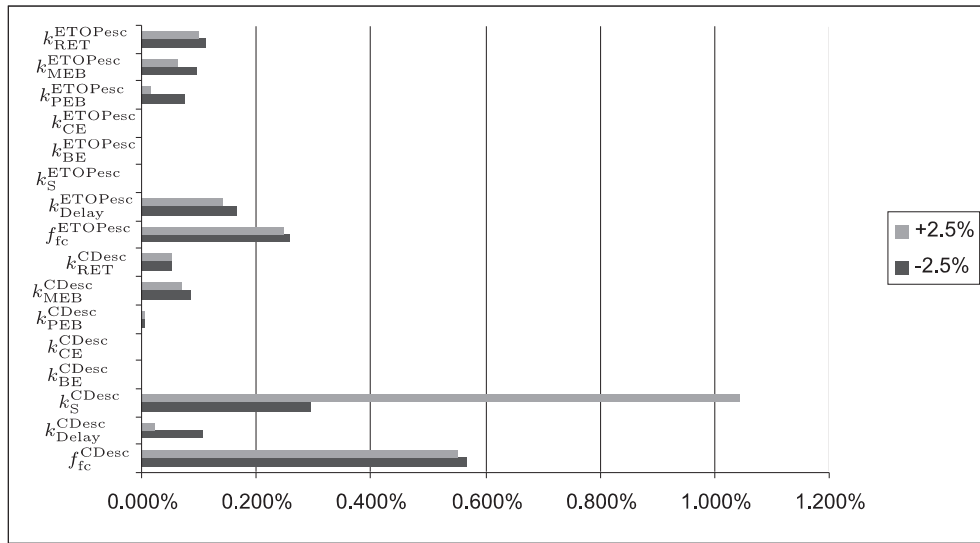

Figure 6. Sensitivity of toxicity parameters for BEACOPP escalated chemotherapy

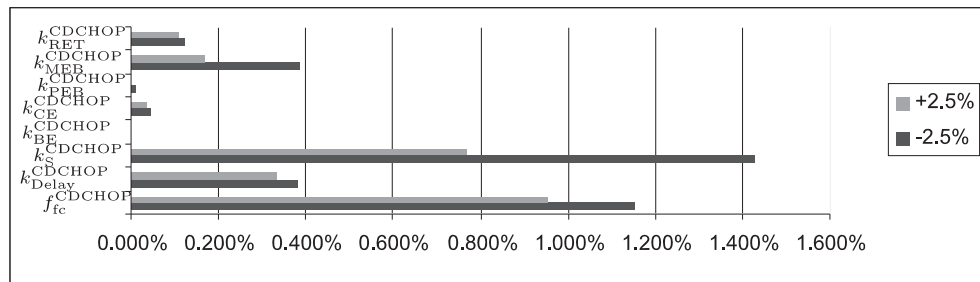

Figure 7. Sensitivity of toxicity parameters for CHOP chemotherapy

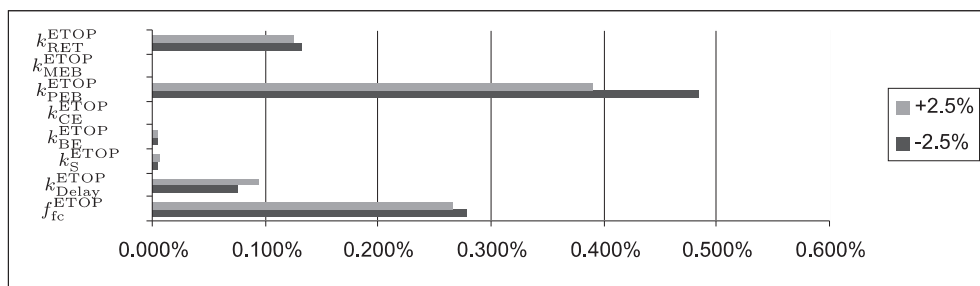

Figure 8. Sensitivity of toxicity parameters for etoposide



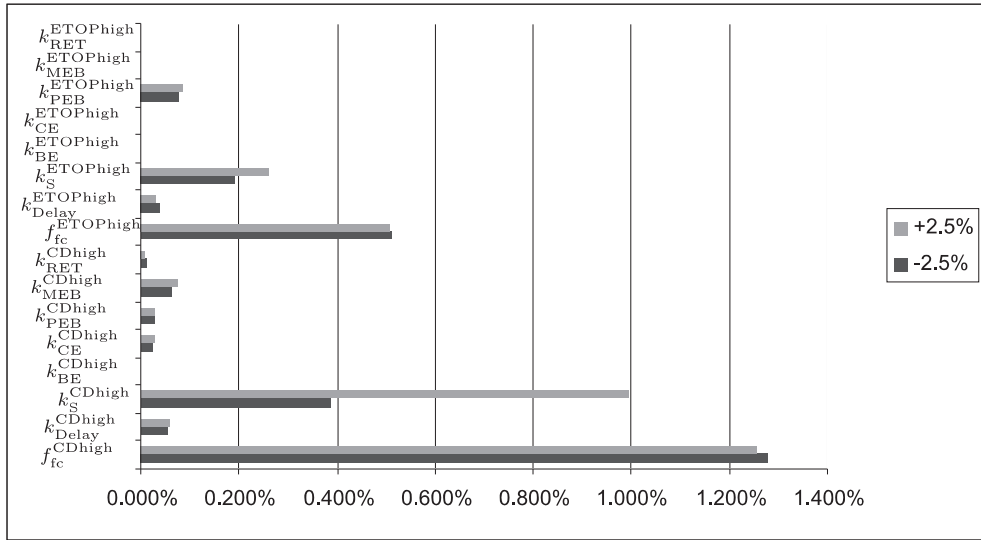

Figure 9. Sensitivity of toxicity parameters for high-CHOEP chemotherapy

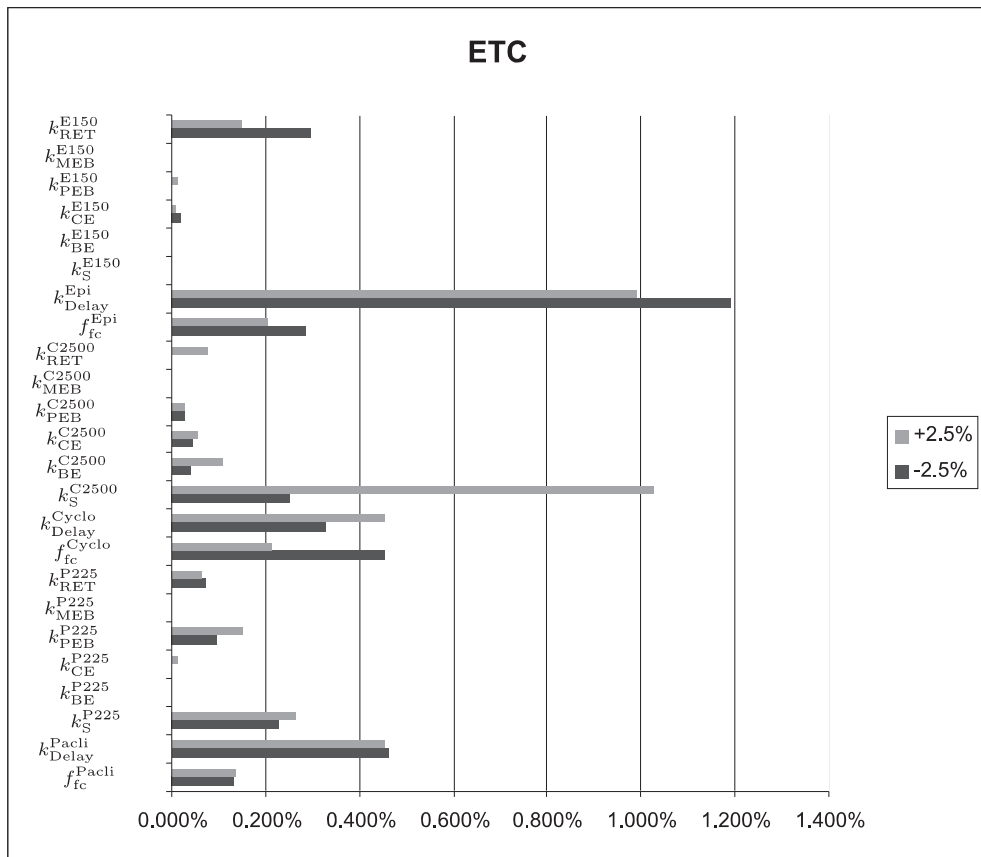

Figure 10. Sensitivity of toxicity parameters for ETC chemotherapy

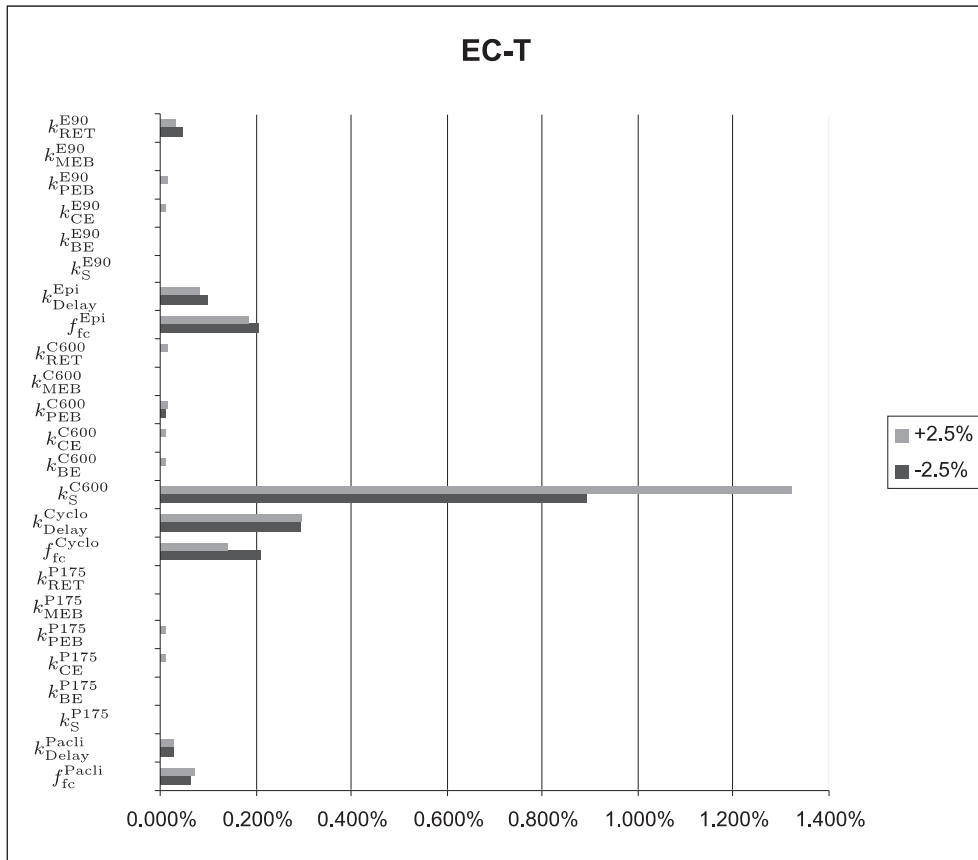

Figure 11. Sensitivity of toxicity parameters for EC-T chemotherapy

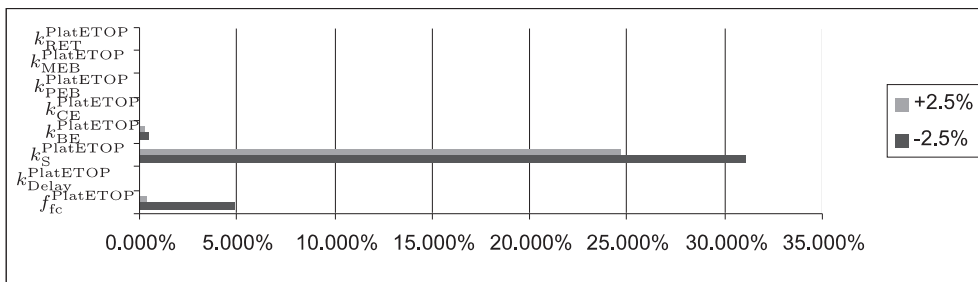

Figure 12. Sensitivity of toxicity parameters for the chemotherapy Platinum plus Etoposide

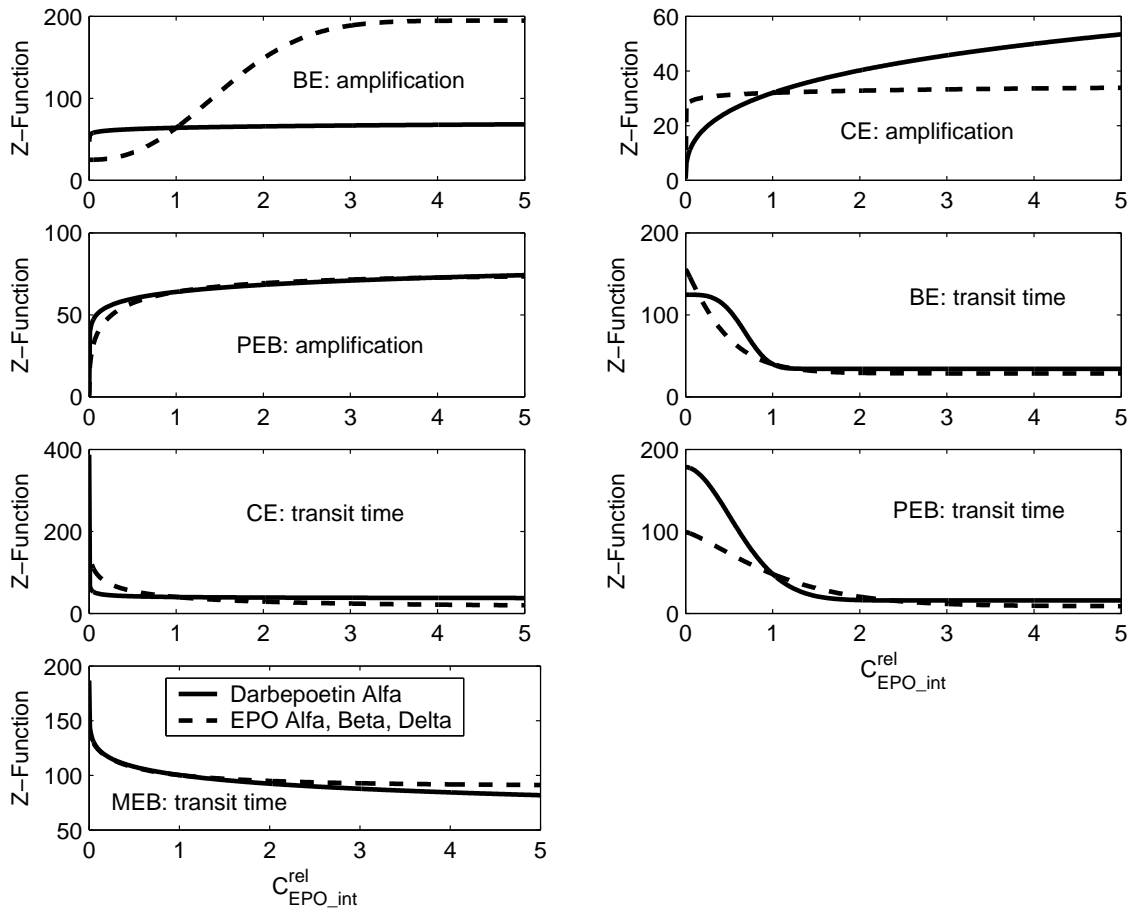

**Figure 13.** Z-functions of the amplifications in compartments BE, CE, PEB and the transition times in BE, CE, PEB, MEB

## A.5 Simulation

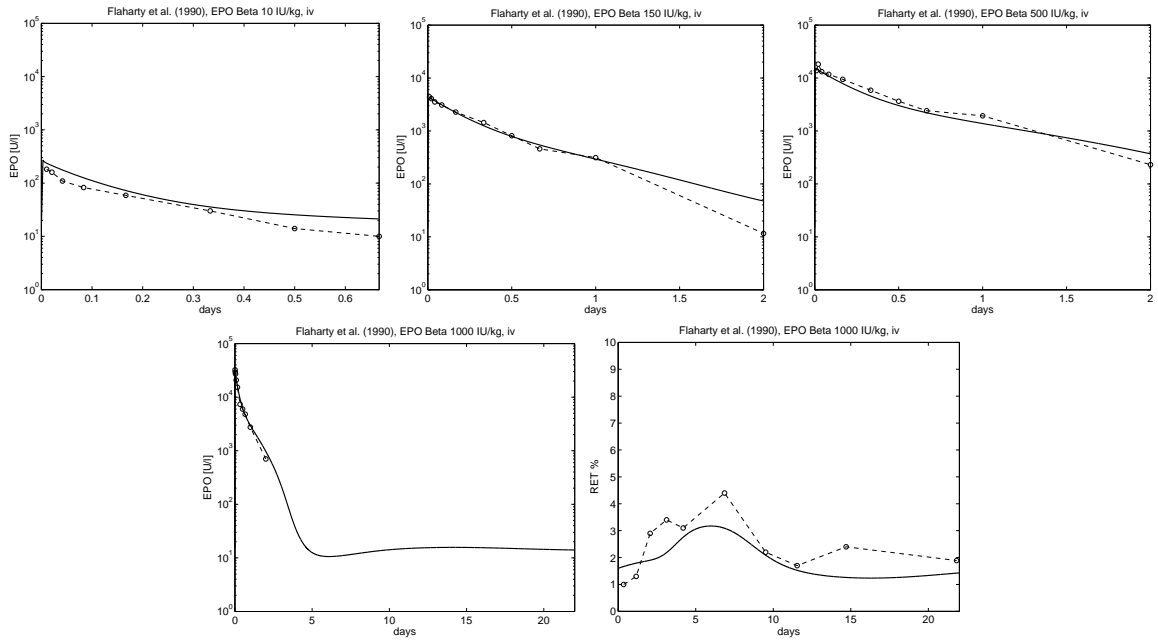

Figure 14. Serum concentration of erythropoietin, simulation (black line) and data (circle), data: [8]

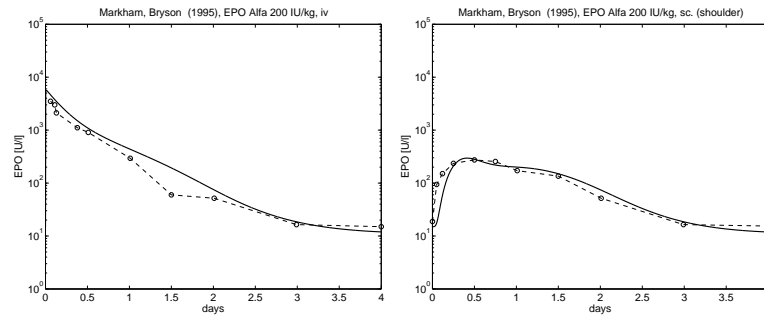

Figure 15. Serum concentration of erythropoietin (simulation and data), data: [9]

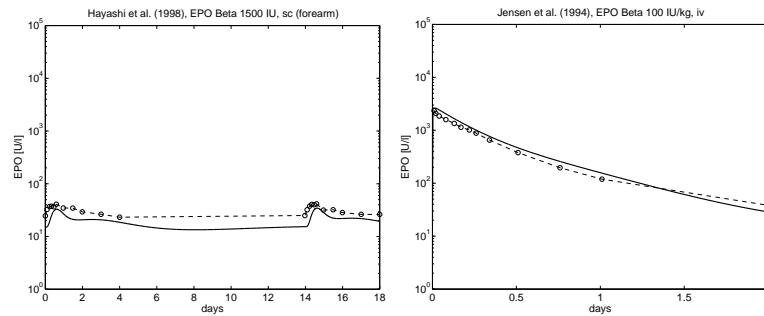

Figure 16. Serum concentration of erythropoietin (simulation and data), data: [10, 11]

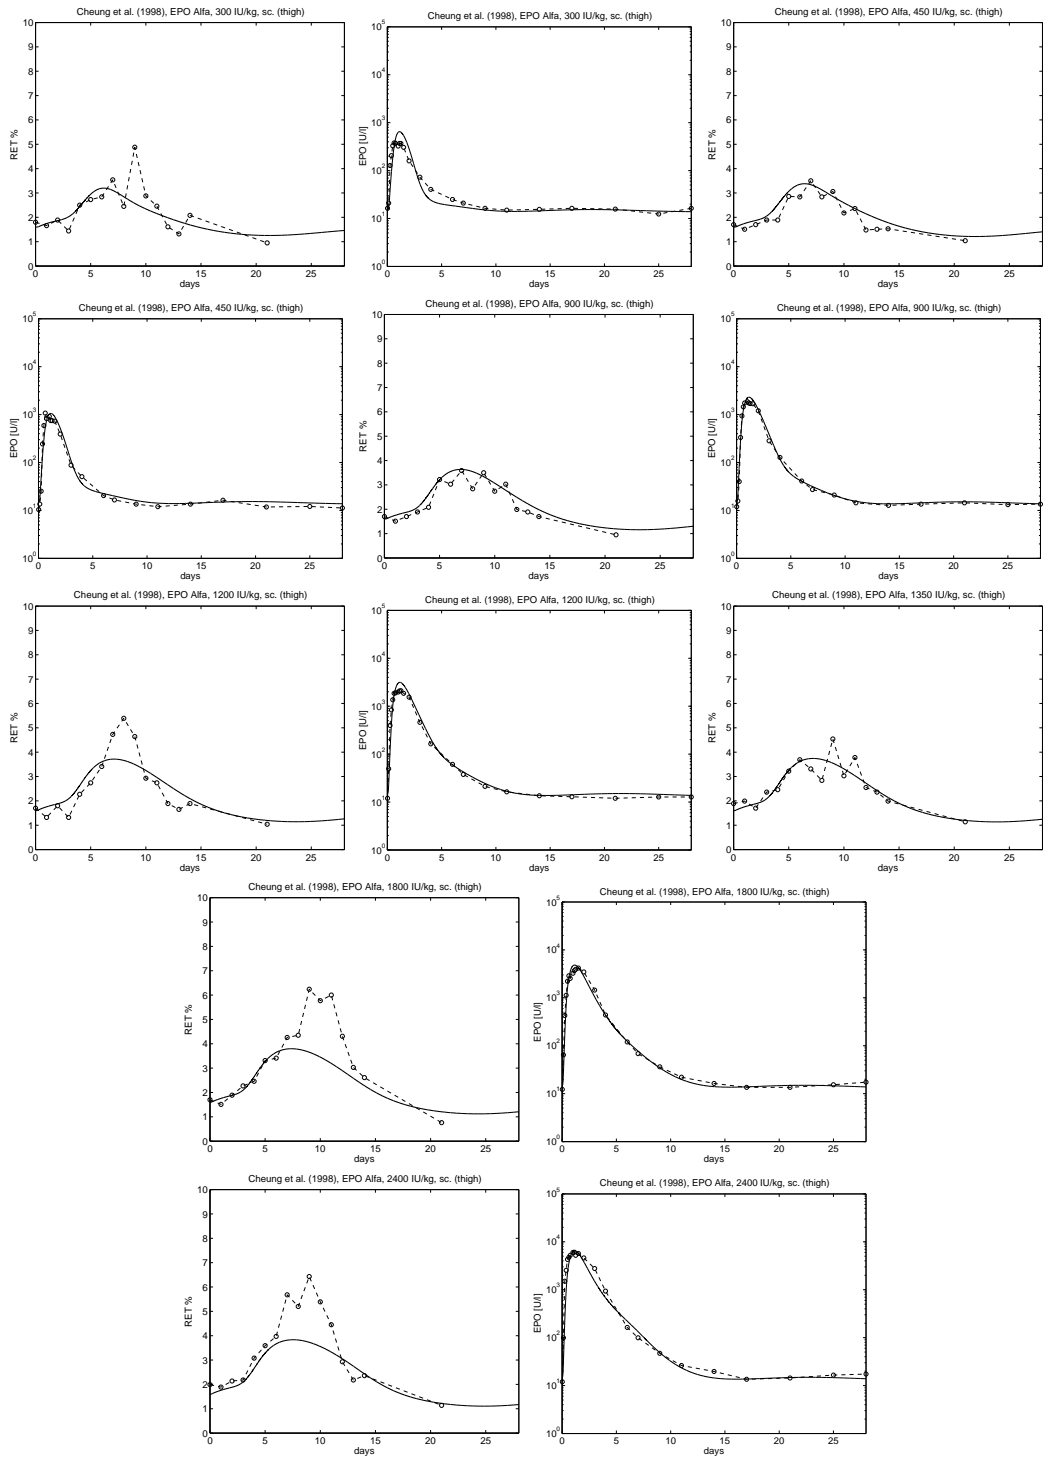

**Figure 17.** Serum concentration of erythropoietin and reticulocytes %, simulation (black line) and data (circle), data: [12]

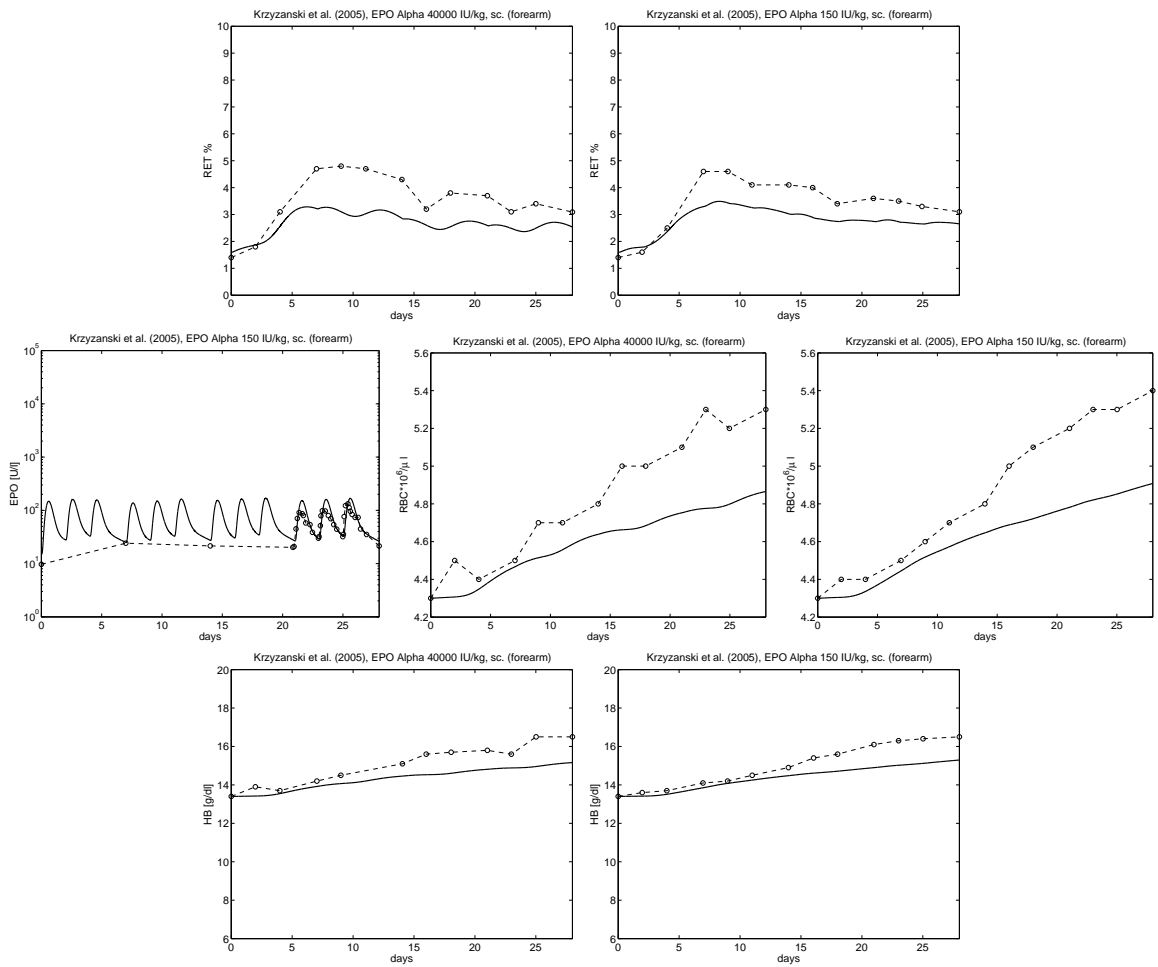

**Figure 18.** Serum concentration of erythropoietin, HB value, RBC, and reticulocytes %, simulation (black line) and data (circle), data: [7]

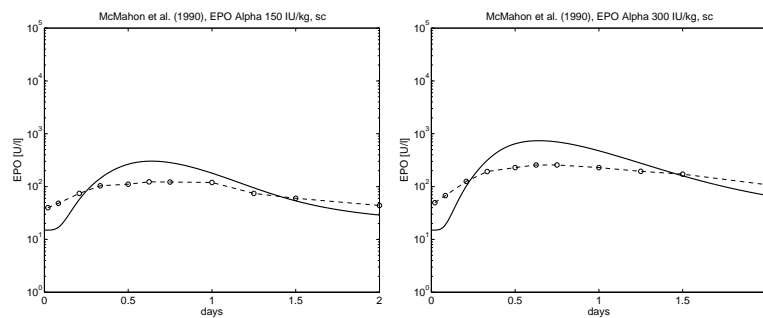

**Figure 19.** Serum concentration of erythropoietin, simulation (black line) and data (circle), data: [13]

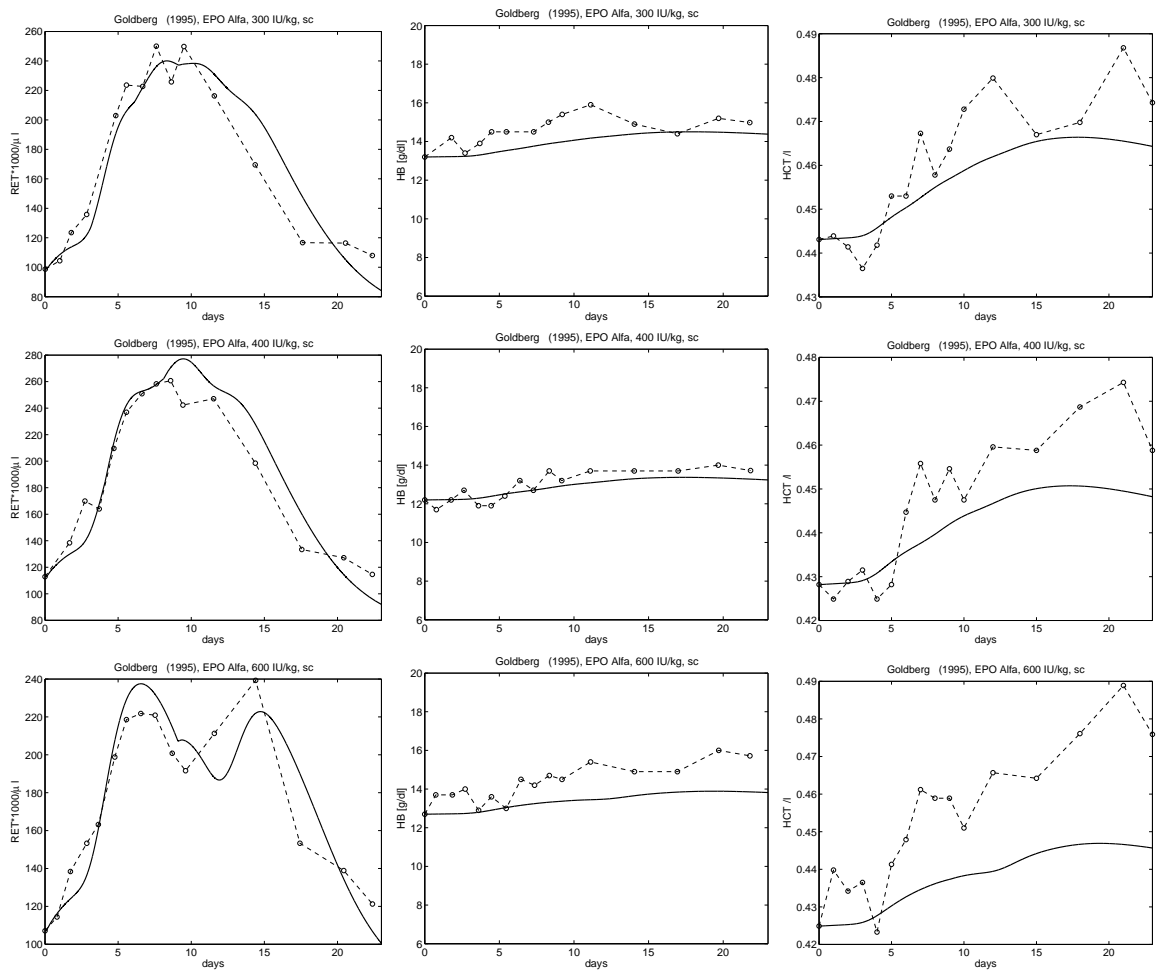

**Figure 20.** Serum concentration of erythropoietin, HB and HCT value, simulation (black line) and data (circle), data: [14], [15], only from subjects with baseline HCT of less than 48%. If the HCT rose above 55%, phlebotomy was performed.

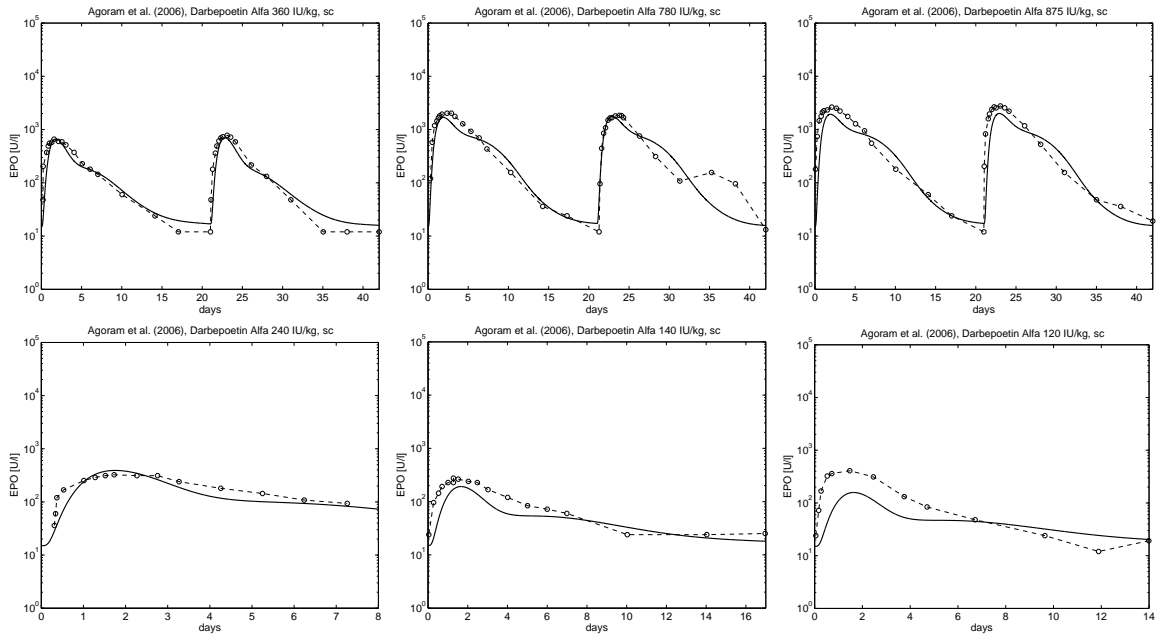

**Figure 21.** Serum concentration of erythropoietin, simulation (black line) and data (circle), data: [16]

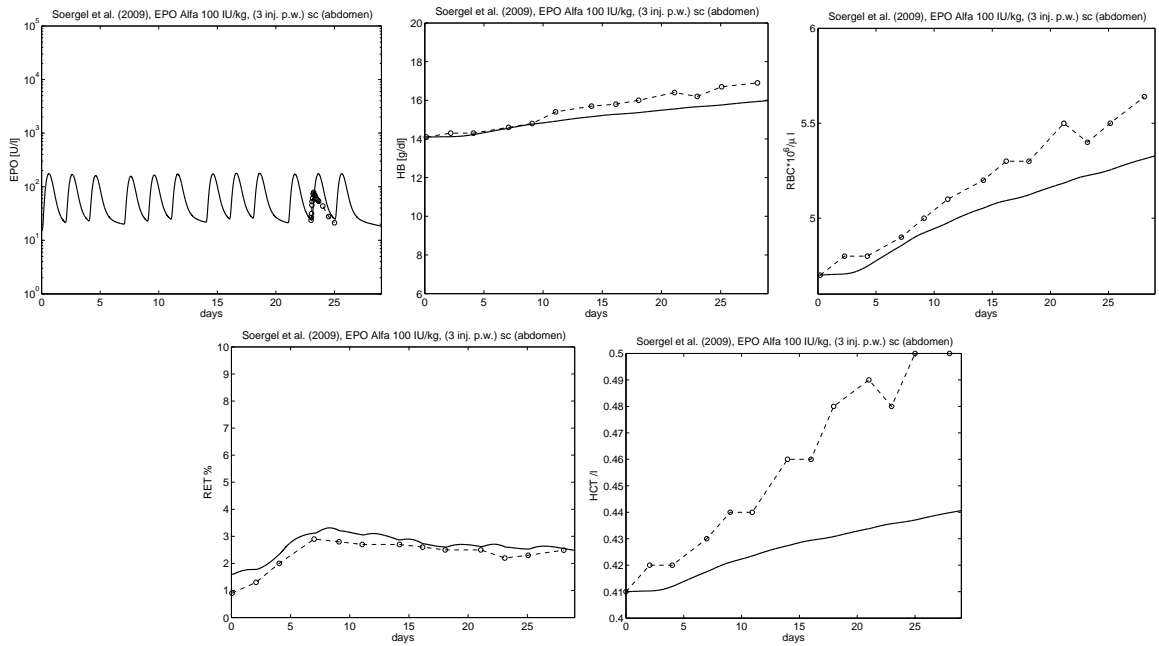

**Figure 22.** Serum concentration of erythropoietin, HB, RBC, reticulocytes % and HCT, simulation (black line) and data (circle), data: [17]



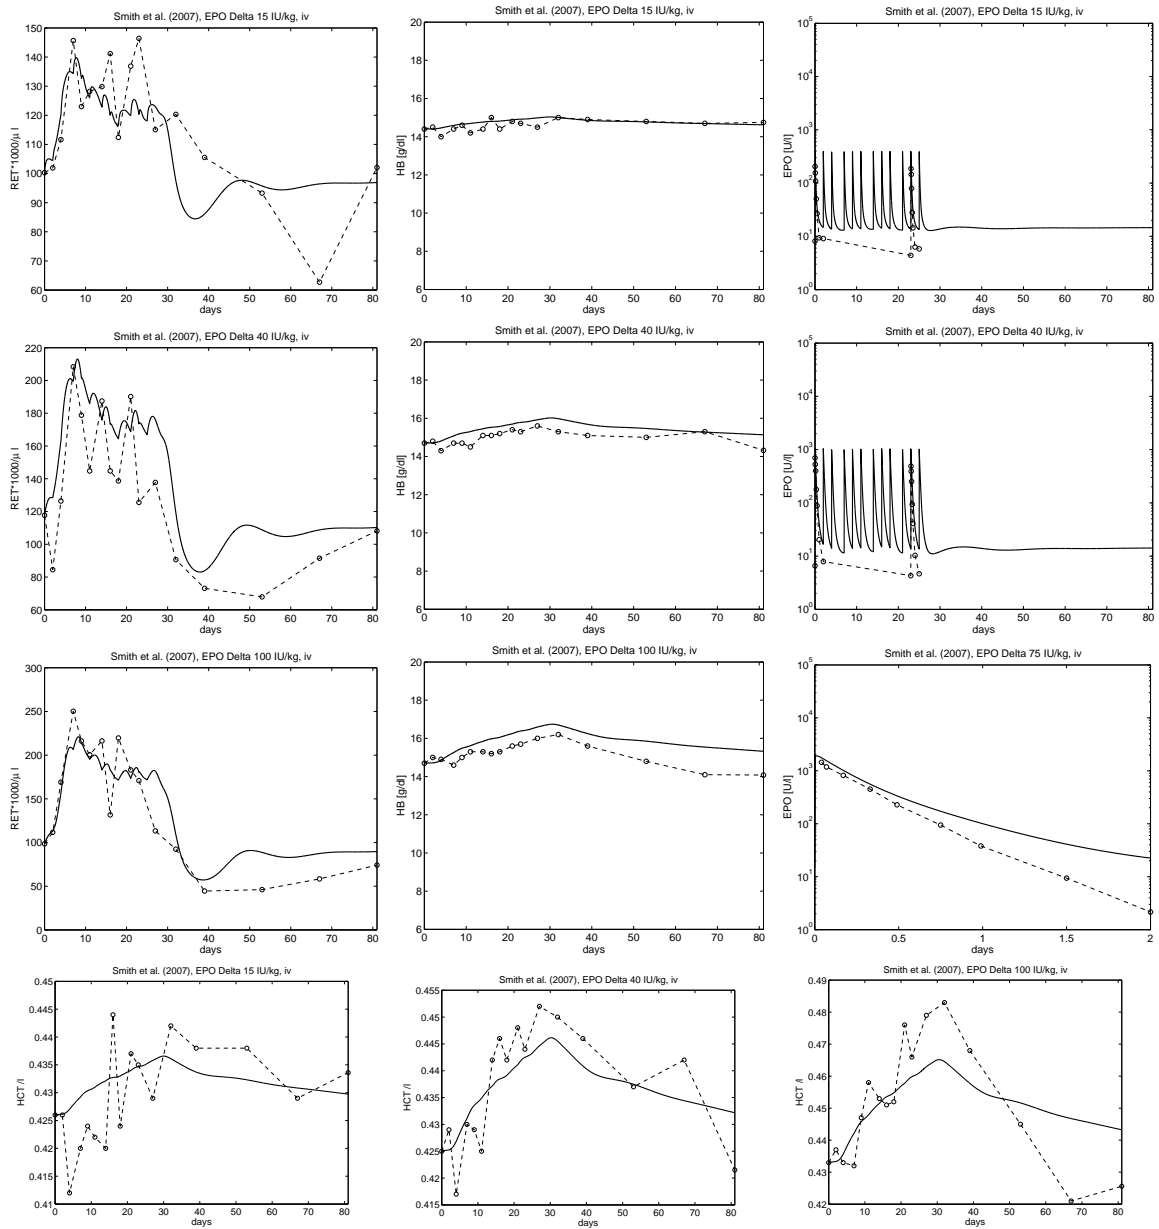

**Figure 23.** HB, reticulocytes %, Serum concentration of erythropoietin and HCT, simulation (black line) and data (circle), data: [18]

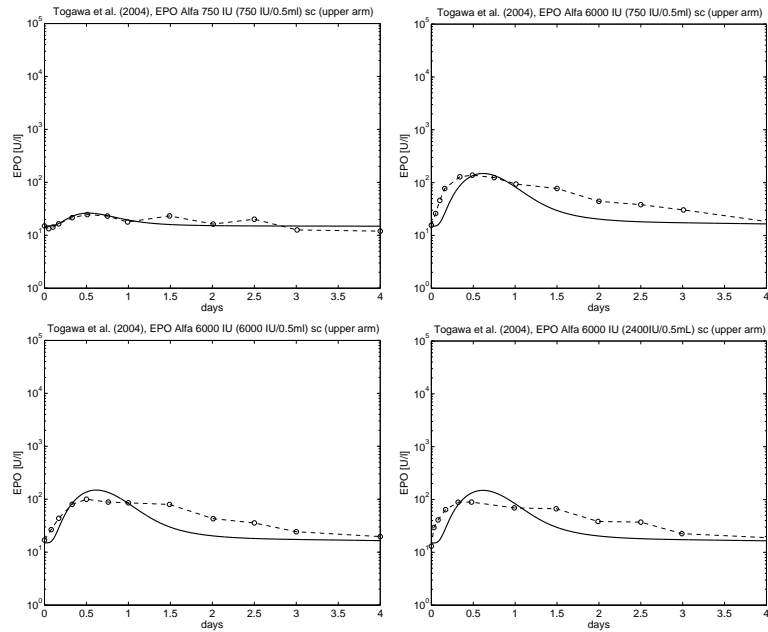

Figure 24. Serum concentration of erythropoietin, simulation (black line) and data (circle), data: [19]

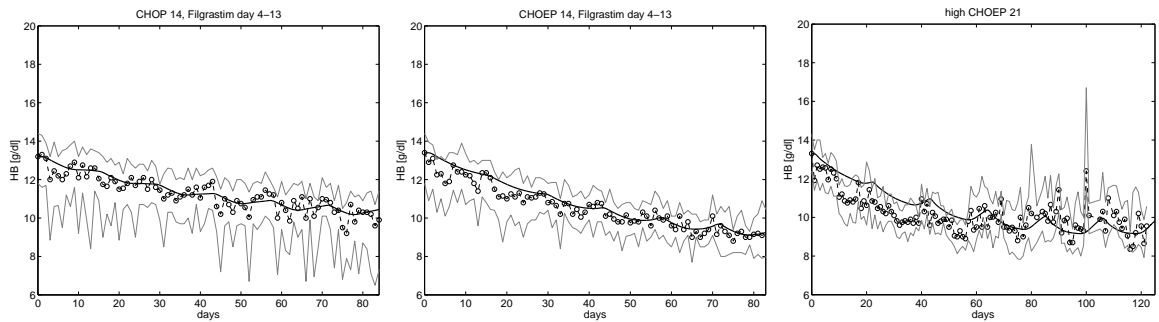

Figure 25. HB value simulation (black line) and data (circle), percentile 25, 75 (grey line), data: [20-22]

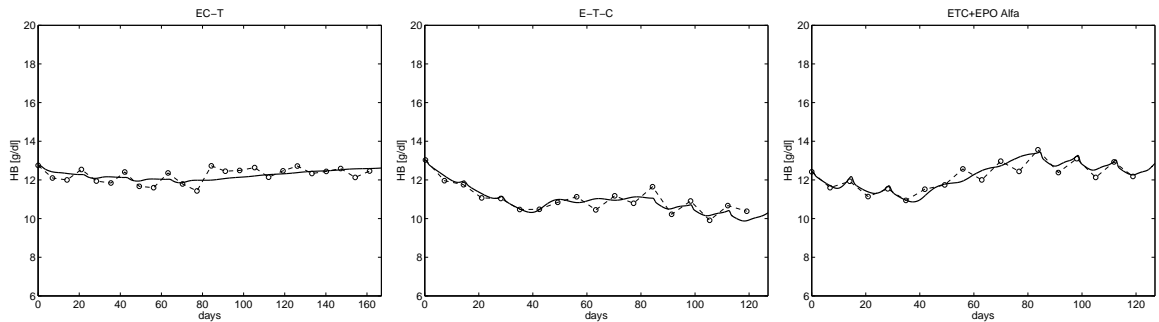

Figure 26. HB value, simulation (black line) and data (circle), data: [23]

## References

1. Scholz M, Engel C, Loeffler M (2005) Modelling human granulopoiesis under polychemotherapy with g-csf support. *J Math Biol* 50: 397–439.
2. Wichmann H, Loeffler M (1985) Mathematical modeling of cell proliferation: Stem cell regulation in hemopoiesis, Vol. 1, 2. CRC Press.
3. Loeffler M, Pantel K, Wulff H, Wichmann H (1989) A mathematical model of erythropoiesis in mice and rats. part 1: Structure of the model. *Cell Tissue Kinet* 22: 13–30.
4. Pantel K (1987) Erweiterung eines kybernetischen Modelles der Erythropoese und dessen Anwendung für normale und pathologische Mäuse. Dissertation, Universität zu Köln (in German).
5. Wichmann H (1983) Computer modeling of erythropoiesis. In: *Current Concepts in Erythropoiesis*, Chapter V., John Wiley and Sons.
6. Franke M, Schmitz S (1993) Modell Mensch aus Übersicht über die Modelle zur Hämatopoese 1979-1993. Universität zu Köln.
7. Krzyzanski W, Wyska E (2008) Pharmacokinetics and pharmacodynamics of erythropoietin receptor in healthy volunteers. *Naunyn-Schmiedeberg's Arch Pharmacol* 377: 637–645.
8. Flaharty K, Caro J, Erslev A, Whalen J (1990) Pharmacokinetics and erythropoietic response to human recombinant erythropoietin in healthy men. *Clin Pharmacol Ther* 47: 557–564.
9. Markham A, Bryson H (1995) Epoetin alfa. a review of its pharmacodynamic and pharmacokinetic properties and therapeutic use in nonrenal applications. *Drugs* 49: 232–254.
10. Hayashi N, Kinoshita H, Yukawa E, Higuchi S (1998) Pharmacokinetic analysis of subcutaneous erythropoietin administration with nonlinear mixed effect model including endogenous production (7). *Br J Clin Pharmacol* 46: 11–19.
11. Jensen J, Madsen J, Jensen L, Pedersen E (1994) Reduction absorption and elimination of erythropoietin in uremia compared with healthy volunteers. *J Am Soc Nephrol* 5: 177–185.

12. Cheung W, Goon B, Guilfoyle M, Wachholtz M (1998) Pharmacokinetics and pharmacodynamics of recombinant human erythropoietin after single and multiple subcutaneous doses to healthy subjects. *Clin Pharmacol Ther* 8: 309–317.
13. McMahon F, Vargas R, Ryan M, Jain A, Abels R, et al. (1990) Pharmacokinetics and effects of recombinant human erythropoietin after intravenous and subcutaneous injections in healthy volunteers. *Blood* 76: 1718–1722.
14. Goldberg M (1995) Erythropoiesis, erythropoetin, and iron metabolism in elective surgery: Preoperative strategies for avoiding allogeneic blood exposure. *Am J Surg* 170 : 37S–43S.
15. Rutherford C, Schneider T, Dempsey H, Kirn D, Brugnara C, et al. (1994) Efficacy of different dosing regimens for recombinant human erythropoietin in a simulated perisurgical setting: The importance of iron availability in optimizing response. *Am J Med* 96: 139–145.
16. Agoram B, Sutjandra L, Sullivan J (2006) Population pharmacokinetics of darbepoetin alfa in healthy subjects. *Br J Clin Pharmacol* 63: 41–52.
17. Sörgel F, Thyroff-Friesinger U, Vetter A, Vens-Cappell B, Kinzig M (2009) Bioequivalence of hx575 (recombinant human epoetin alfa) and a comparator epoetin alfa after multiple subcutaneous administrations. *Pharmacology* 38: 122–130.
18. Smith W, Dowell J, Pratt R (2007) Pharmacokinetics and pharmacodynamics of epoetin delta in two studies in healthy volunteers and two studies in patients with chronic kidney disease. *Clinical Therapeutics* 29: 1368–1380.
19. Togawa A, Tanaka T, Nagashima S, Keta H, Kobayashi Y, et al. (2004) A comparison of the bioequivalence of two formulations of epoetin alfa after subcutaneous injection. *Br J Clin Pharmacol* 58: 269–276.
20. Pfreundschuh M, Truemper L, Kloess M, Schmits R, Feller A, et al. (2004) 2-weekly or 3-weekly chop chemotherapy with or without etoposide for the treatment of young patients with good prognosis (normal ldh) aggressive lymphomas: results of the nhl-b1 trial of the dshnhl. *Blood* 104: 626–633.

21. Pfreundschuh M, Truemper L, Kloess M, Schmits R, Feller A, et al. (2004) 2-weekly or 3-weekly chop chemotherapy with or without etoposide for the treatment of elderly patients with aggressive lymphomas: results of the nhl-b2 trial of the dshnhl. *Blood* 104: 634–641.
22. Pfreundschuh M, Zwick C, Zeynalova S, Dührsen U, Pflüger KH, et al. (2008) Dose-escalated choep for the treatment of young patients with aggressive non-hodgkin's lymphoma: 2. results of the randomized high-choep trial of the german high-grade non-hodgkin's lymphoma study group (dshnhl). *Ann Oncol* 19: 545–552.
23. GBG. German breast group, available: <http://www.germanbreastgroup.de/studien/adjutant/gain/unterlagen.html> accessed 2011 october 11.
